# Supplementary material for: The draft genome of strain cCpun from biting midges confirms insect Cardinium are not a monophyletic group and reveals a novel gene family expansion in a symbiont
Source: PubMed Central journal article supplement (PMC6387759; doi:10.7717/peerj.6448), 2019-02-21

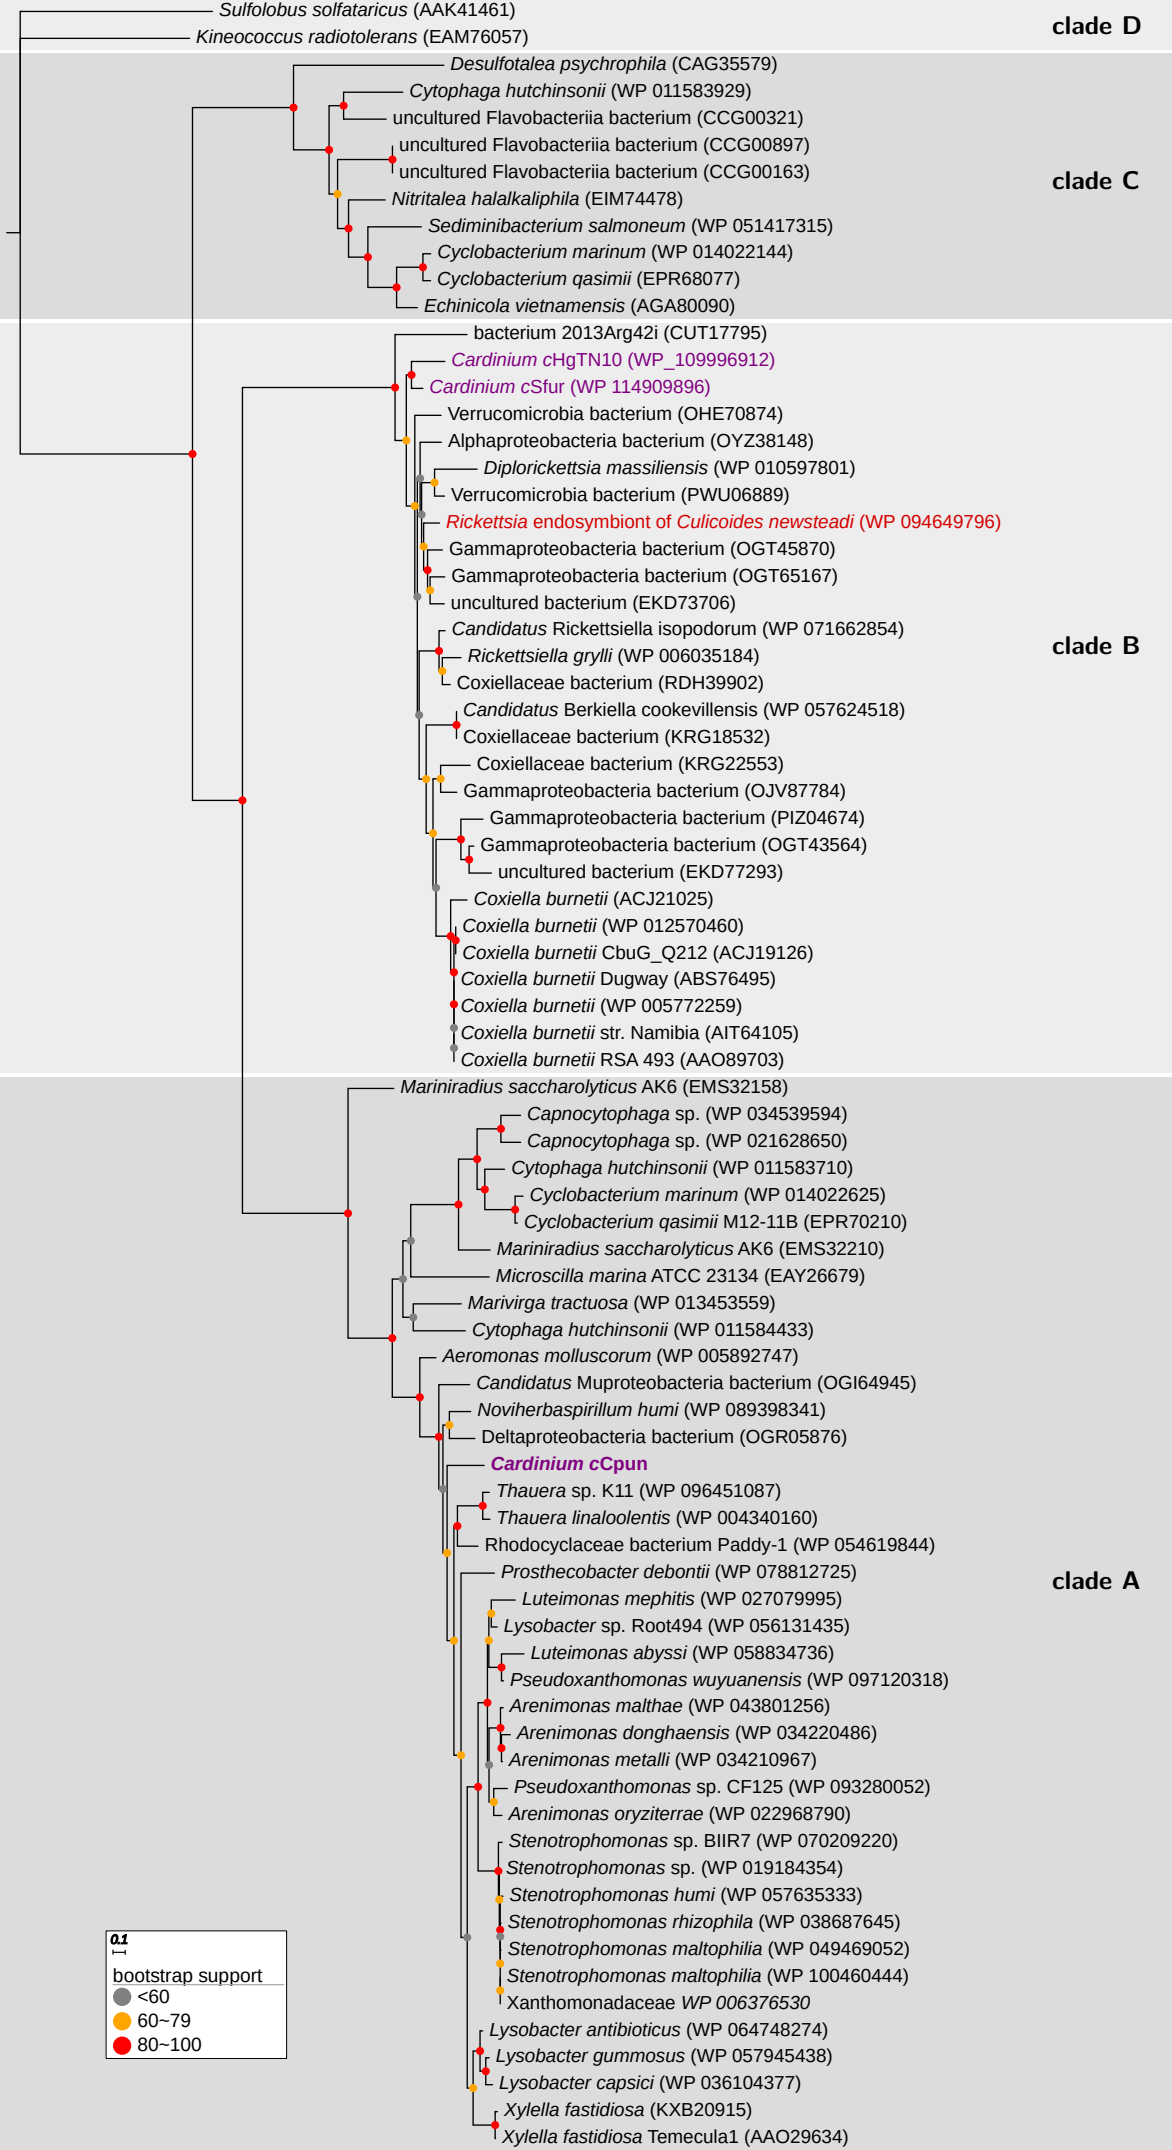

Supplement: peerj-07-6448-s008.pdf [file peerj-07-6448-s008.pdf]
