# Supplementary material for: The draft genome of strain cCpun from biting midges confirms insect Cardinium are not a monophyletic group and reveals a novel gene family expansion in a symbiont
Source: PeerJ journal article supplement (doi:10.7717/peerj.6448), 2019-02-21
Supplement: Supplemental_Figure_S3_revised.pdf [file Supplemental_Figure_S3_revised.pdf]

# BUSCO Assessment Results

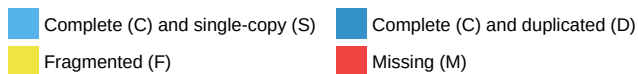

*A.asiaticus*\*

C:125 [S:124, D:1], F:5, M:18, n:148

cBtQ1

C:118 [S:118, D:0], F:4, M:26, n:148

cCpun

C:117 [S:117, D:0], F:4, M:27, n:148

cEper1\*

C:116 [S:116, D:0], F:3, M:29, n:148

cHgTN10\*

C:112 [S:112, D:0], F:6, M:30, n:148

cPpe

C:109 [S:103, D:6], F:3, M:36, n:148

cSfur\*

C:117 [S:117, D:0], F:6, M:25, n:148

0

20

40

60

80

100

%BUSCOs
